# Supplementary material for: Cross-sectional association between 24-hour movement guidelines and depressive symptoms in Chinese university students
Source: PeerJ. 2024 Apr 15;12:e17217. doi: 10.7717/peerj.17217 (PMC11025541; doi:10.7717/peerj.17217)
Supplement: Supplemental Information 2 [file peerj-12-17217-s002.pdf]

| Name             |                                          | Label | Value                                                                 | Labels |
|------------------|------------------------------------------|-------|-----------------------------------------------------------------------|--------|
| gender           | sex                                      |       | 1 male<br>2 female                                                    |        |
| age              | age                                      |       |                                                                       |        |
| BMI              | BMI                                      |       |                                                                       |        |
| siblings         | number of children in the family         |       | 1 single<br>2 two or more                                             |        |
| residence        | geographic location                      |       | 1 urban<br>2 rural                                                    |        |
| fa_structure     | family structure                         |       | 1 living with both parents<br>2 parents divorced<br>3 other           |        |
| fa_edu           | father education                         |       | 1 middle school<br>2 high school<br>3 college<br>4 graduate and above |        |
| mo_edu           | mother education                         |       | 1 middle school<br>2 high school<br>3 college<br>4 graduate and above |        |
| friends          | number of close friends                  |       | 1 none<br>2 1-2<br>3 3-5<br>4 6 or more                               |        |
| MVPA_guidelines  | meeting the PA guidelines                |       | 0 not meeting<br>1 meeting                                            |        |
| sleep_guidelines | meeting the sleep guidelines             |       | 0 not meeting<br>1 meeting                                            |        |
| SB_guidelines    | meeting the SB guidelines                |       | 0 not meeting<br>1 meeting                                            |        |
| co_24            | meeting the PA, SB, and sleep guidelines |       | 0 meet none<br>1 meet one<br>2 meet two<br>3 meet all                 |        |
| PHQ_cat          | depression binary                        |       | 0 negative<br>1 positive                                              |        |
